# Supplementary material for: Factors Associated With the Microbiome in Moderate–Late Preterm Babies: A Cohort Study From the DIAMOND Randomized Controlled Trial
Source: Front Cell Infect Microbiol. 2021 Mar 1;11:595323. doi: 10.3389/fcimb.2021.595323 (PMC7958882; doi:10.3389/fcimb.2021.595323)
Supplement: Supplementary file 4 [file Table_1.xlsx]

## Sheet: Description
ASVs	Amplicon sequencing variants
F	Forward read
R	Reverse read

## Sheet: read_count_table_16S
Supplementary Table S1: Read counts of 16S amplicon data after each quality control step.
Sample	input	filtered	denoisedF	denoisedR	merged	filtered_asvs
ACH-0024	110352	80221	79943	80055	78817	74597
MMH-0035	86039	63567	63460	63490	62997	61027
ACH-4-0027	94543	63209	63075	63134	62397	57923
MMH-0070	82019	57852	57705	57795	57262	54442
ACH-0006	97451	62274	61833	62095	60423	54408
MMH-0059	83582	57854	57636	57735	57051	53430
ACH-0043	85364	58451	58337	58325	57034	53077
ACH-0094	83885	58125	57885	58028	56908	52972
WT-4-0004	106874	60722	60070	60421	58914	52113
MMH-4-0048	89422	57900	56802	57313	54708	50884
MMH-0063	80428	55432	55240	55311	54281	50736
ACH-0076	78040	52294	52193	52221	51838	49661
MMH-0010	81613	54098	53860	54000	53403	49479
ACH-0003	81964	54935	54707	54805	53798	49318
MMH-0075	81509	53186	53111	53116	52493	49071
ACH-4-0057	92100	55761	54971	55395	53621	49065
NSH-0006	75372	51701	51605	51643	51250	48829
ACH-0009	77579	53840	53613	53725	52863	48696
MMH-4-0025	76144	54292	54004	54150	53455	48594
ACH-0027	83632	52860	52759	52748	52008	48182
NSH-0022	79987	53702	53563	53577	52591	48157
MMH-0065	76875	52533	52404	52473	51931	48091
NSH-0021	79366	52741	52576	52663	51879	47931
MMH-0034	80562	51938	51811	51820	51239	47909
ACH-4-0075	75323	53298	53156	53191	52652	47850
MMH-0046	79124	53094	52885	52984	52470	47621
ACH-0049	78952	51819	51692	51744	50974	47573
NSH-4-0011	80415	52486	52316	52411	51757	47502
ACH-0062	65287	48642	48582	48598	48305	47481
ACH-0090	78391	53002	52799	52962	51984	47252
ACH-4-0041	81028	55209	54862	55071	53611	46509
ACH-4-0050	79874	50510	50212	50343	49466	46264
NSH-0014	77013	48678	48518	48570	47778	45889
ACH-0047	76621	50536	50255	50428	49547	45802
ACH-0048	78709	51691	51501	51572	50367	45748
ACH-0057	72115	48364	48245	48314	48019	45135
ACH-0089	76490	50315	50005	50181	49460	45048
MMH-4-0038	90571	51005	50612	50869	49878	45036
ACH-4-0070	75626	49181	49047	49059	48279	44505
ACH-4-0033	85352	50149	49712	49976	49188	44370
ACH-4-0040	81594	49022	48555	48730	47277	44315
MMH-4-0033	76458	46940	46647	46780	46135	43941
ACH-0086	66521	48019	47825	47924	47325	43669
MMH-0050	68073	46589	46476	46516	45997	43531
MMH-0027	78655	48287	48084	48152	47540	43455
MMH-0049	60975	43466	43431	43407	43249	43226
ACH-4-0010	82564	49255	48787	49034	47716	43136
MMH-4-0027	82677	50509	50200	50304	49151	42814
WT-0010	67382	46324	46182	46237	45674	42757
ACH-0074	64649	48283	48183	48213	47363	42689
MMH-0056	86068	51255	51114	51178	50263	42516
MMH-0013	62533	47423	47358	47382	47039	42371
ACH-4-0058	68111	44151	43803	43872	43184	42200
ACH-4-0049	72158	46176	45902	45979	45063	42164
MMH-4-0012	67231	43845	43456	43660	42933	42122
ACH-4-0014	70017	46456	46241	46374	45497	41858
MMH-4-0002	76388	47890	47268	47608	46254	41842
NSH-4-0016	69386	45240	44811	45092	44220	41804
ACH-4-0080	69688	45342	45024	45164	44513	41803
ACH-0031	62348	43675	43570	43605	43356	41792
MMH-0062	63953	45343	45220	45290	44825	41602
ACH-0053	70650	49969	49873	49912	49562	41582
ACH-0059	67597	44686	44542	44559	44037	41378
ACH-0021	64470	44708	44617	44666	44219	41316
ACH-0087	66869	47264	47073	47158	46633	41090
NSH-0005	69379	45797	45541	45743	44838	40993
NSH-4-0023	70684	44871	44083	44477	42816	40908
NSH-4-0007	82757	48955	48420	48757	47406	40901
ACH-4-0059	71955	44941	44695	44830	44105	40825
ACH-4-0026	69198	44316	43842	44114	43361	40675
NSH-0009	70795	43868	43664	43737	43331	40580
MMH-0076	64929	42519	42459	42460	42291	40458
MMH-0029	63002	44350	44210	44252	43323	40181
NSH-0004	66010	44706	44424	44561	43822	39979
ACH-4-0034	66565	42768	42561	42639	41735	39884
MMH-4-0009	69598	42854	42540	42652	42092	39731
MMH-0019	58340	41786	41678	41737	41395	39685
NSH-4-0017	69031	45045	44788	44913	43374	39573
WT-4-0006	68031	41742	41356	41618	40870	39449
MMH-0071	59960	41657	41522	41604	41307	39401
ACH-0078	61947	41958	41872	41912	41473	39274
NSH-0030	53164	40167	40089	40107	40002	39244
MMH-4-0011	69078	45273	44910	45138	43453	39118
NSH-0001	64856	42921	42768	42837	42560	39102
MMH-4-0018	63492	44369	44249	44318	43765	39101
MMH-4-0019	68045	43390	43158	43179	42410	39096
MMH-0021	64677	43223	42955	43133	42301	38929
MMH-4-0063	64842	42969	42823	42912	42288	38905
MMH-4-0059	72407	45272	44742	45033	43339	38869
NSH-0026	59927	42615	42378	42531	42030	38868
MMH-4-0064	67078	43007	42769	42899	41991	38860
MMH-4-0004	67890	42604	42198	42363	41373	38663
MMH-4-0060	69983	43443	42993	43203	42295	38591
ACH-4-0036	71195	42932	42578	42777	41922	38523
MMH-4-0044	61431	41891	41689	41792	41100	38311
MMH-0001	64668	42933	42728	42806	42188	38310
MMH-0033	55592	39801	39691	39768	39462	38275
NSH-4-0018	75914	43840	43411	43687	43025	38038
ACH-0012	62465	40966	40843	40874	40353	38006
ACH-4-0077	66760	43809	43477	43710	42310	37997
MMH-0079	50774	38021	37985	37992	37874	37793
ACH-4-0066	62979	42135	41904	41969	41119	37717
WT-0009	66107	41480	41207	41353	40618	37664
WT-0005	61298	45002	44853	44943	42845	37444
WT-0003	62351	40203	40056	40056	39658	37335
MMH-0012	58379	41097	40923	41029	40506	37334
ACH-0061	62930	41262	41092	41161	40763	37319
ACH-0055	59192	42351	42153	42224	41592	37281
ACH-4-0084	65129	43504	42879	43282	41579	37256
ACH-4-0019	62412	41730	41400	41590	40613	37181
MMH-0061	57775	40396	40342	40351	39991	37064
ACH-0060	60915	39929	39851	39816	39585	36852
ACH-4-0046	62289	42443	42225	42373	41263	36835
NSH-4-0012	66087	42940	42610	42702	41575	36779
NSH-0024	58219	40485	40355	40409	39953	36712
ACH-0036	64442	41638	41431	41499	40656	36653
ACH-0042	57883	39151	39047	39064	38735	36511
ACH-0025	66504	43185	42890	43045	42017	36442
MMH-0051	53911	38304	38247	38275	38026	36345
ACH-0046	52206	37802	37697	37712	37193	36314
WT-0001	64234	41961	41736	41880	41327	36306
MMH-0040	61516	43001	42844	42945	42425	36124
MMH-0060	53478	38349	38257	38250	37879	36102
MMH-0016	50895	38777	38711	38724	38395	36074
ACH-0075	55508	40568	40410	40521	39702	36043
ACH-4-0079	69032	40023	39625	39835	39109	35991
NSH-0013	64016	40768	40609	40680	39898	35856
ACH-0070	49074	36622	36559	36577	36318	35856
NSH-4-0021	64651	40603	40122	40364	39436	35676
MMH-4-0026	65191	39934	39551	39768	39112	35667
NSH-0010	59017	38610	38493	38535	38035	35516
NSH-4-0019	61156	38243	37823	38061	37014	35491
ACH-0020	50069	36261	36177	36207	36037	35440
MMH-0068	60360	38655	38430	38578	37639	35391
MMH-0077	49927	36852	36749	36799	36376	35068
ACH-0014	61308	37677	37551	37618	36905	35049
ACH-0069	47504	35178	35153	35160	35011	34955
NSH-4-0024	59730	38120	37869	37997	37406	34686
ACH-4-0083	61283	36390	36138	36243	35438	34675
MMH-4-0007	66307	39244	38787	39070	37998	34617
MMH-4-0049	61553	36864	36685	36785	36519	34517
ACH-0088	53804	36984	36806	36926	36404	34517
MMH-0057	47847	35589	35493	35502	35297	34363
NSH-4-0001	61818	37978	37598	37742	36751	34353
MMH-0078	47174	34798	34722	34744	34587	34327
MMH-0067	57068	38263	38081	38186	37471	34240
ACH-0077	57546	37505	37401	37424	36931	34233
MMH-0015	49538	34464	34416	34420	34295	34122
ACH-0050	56924	37043	36872	36951	36272	34069
ACH-4-0009	54910	38377	38209	38255	37774	33967
MMH-0044	49823	35199	35151	35151	35020	33855
NSH-0015	58798	39396	39245	39337	38476	33852
MMH-0047	55724	36088	36004	36039	35574	33740
MMH-0022	56157	36580	36439	36522	35355	33401
MMH-4-0010	54379	35461	35183	35340	34827	33344
MMH-0055	58160	39619	39245	39500	38674	33077
NSH-4-0015	54025	35634	35571	35570	35123	33026
MMH-0011	63357	37051	36758	36902	35892	32856
MMH-0003	56338	38190	37990	38123	37227	32762
ACH-0093	54833	35002	34929	34958	34759	32542
ACH-0071	52672	34903	34769	34838	34387	32407
MMH-4-0043	59622	36622	36229	36325	34807	32270
ACH-0022	60211	35481	35237	35300	34783	32187
MMH-0020	49109	35326	35163	35220	34338	32078
ACH-4-0078	52044	35853	35634	35779	35167	32018
MMH-0045	47649	33939	33810	33876	33410	31947
MMH-4-0003	64704	39793	39358	39554	38326	31915
MMH-0005	45960	33094	32977	33064	32851	31773
MMH-0031	53506	34813	34724	34773	34407	31482
NSH-4-0009	58544	36107	35645	35933	34751	31480
MMH-4-0052	49288	34342	34103	34195	33296	31409
ACH-4-0048	55840	33398	33078	33255	32599	31343
MMH-0041	50904	34488	34290	34354	33708	31286
ACH-4-0042	58558	35410	35239	35358	34453	31229
ACH-4-0002	52130	32848	32610	32762	32354	31194
MMH-0064	58765	35773	35542	35677	34838	31167
ACH-4-0007	62066	34771	34525	34684	33984	31107
MMH-0028	52711	34764	34647	34657	34156	30979
NSH-4-0002	53647	36072	35806	35889	35151	30975
ACH-4-0012	46855	32969	32821	32881	32558	30955
NSH-0041	52954	34551	34223	34395	33374	30937
NSH-4-0027	48661	32735	32576	32653	32221	30794
ACH-0001	42439	31177	31130	31128	31061	30788
ACH-0034	42010	31184	31046	31109	30963	30755
MMH-0032	50044	32226	32071	32110	31730	30753
ACH-4-0001	47188	33515	33364	33418	32916	30738
MMH-0053	40410	30993	30978	30980	30917	30649
ACH-0054	51995	37764	37616	37679	37196	30643
ACH-0030	50839	33821	33641	33762	33042	30610
ACH-0083	46053	32599	32478	32546	32295	30560
MMH-4-0029	49766	32825	32736	32774	32324	30527
ACH-4-0055	51591	32801	32588	32666	32268	30507
NSH-0008	50315	32281	32086	32211	31797	30498
ACH-4-0016	51736	34239	34105	34201	33524	30423
ACH-4-0018	54084	34066	33721	33829	32957	30159
MMH-4-0050	50791	32379	32239	32339	31872	30018
ACH-0011	41346	30850	30797	30822	30692	29872
ACH-4-0005	64402	34907	34466	34707	33675	29851
MMH-0080	55819	33990	33731	33823	32910	29833
MMH-4-0041	59504	33921	33484	33686	32783	29791
NSH-0003	53773	35236	35002	35078	34524	29759
ACH-0019	52565	33762	33538	33649	32545	29729
ACH-4-0013	50927	32318	31963	32159	31181	29610
WT-0002	49237	32246	31971	32132	31517	29173
ACH-0035	42519	31266	31132	31224	30806	29097
MMH-4-0023	53603	32699	32231	32563	31151	29094
MMH-0009	45464	31379	31241	31320	30994	29053
MMH-0073	40062	29691	29637	29653	29425	28949
ACH-0002	49241	31311	31170	31244	30607	28868
ACH-0084	45818	30567	30403	30503	30144	28614
ACH-0073	52562	32600	32460	32548	31537	28520
ACH-0080	38843	28813	28766	28782	28668	28464
ACH-0040	45594	30035	29871	29964	29551	28423
ACH-4-0063	41419	30109	29946	30029	29495	28194
ACH-0082	45817	30267	30171	30218	29779	28137
ACH-4-0029	43096	31514	31363	31460	30984	28012
MMH-0074	43523	30560	30323	30429	29897	27888
MMH-0014	42542	29202	29084	29143	28826	27842
ACH-4-0003	47161	28744	28519	28597	28203	27775
MMH-0066	44401	29846	29744	29801	29602	27730
ACH-4-0032	49287	29684	29474	29550	29128	27701
ACH-4-0061	53744	32524	32279	32383	31784	27600
MMH-0048	47781	30601	30422	30455	29947	27483
MMH-4-0006	49369	30242	29980	30053	29114	27458
NSH-0039	46232	29555	29435	29439	29120	27342
ACH-0058	44206	28595	28448	28513	28256	27259
ACH-4-0073	66742	38906	38720	38793	38275	27153
MMH-0081	37624	27851	27779	27786	27593	27128
MMH-0058	47729	28489	28333	28440	28004	27089
ACH-0039	45701	31166	31053	31117	30650	27083
ACH-4-0074	44170	29196	29022	29124	28665	27064
MMH-0025	40733	29609	29537	29576	29311	26960
MMH-4-0001	45070	29146	28917	29060	28592	26891
WT-0007	38692	27829	27780	27803	27591	26786
ACH-0018	37189	27274	27193	27241	27048	26713
ACH-0032	47451	29343	29233	29276	29012	26569
ACH-4-0054	46012	28376	28139	28203	27764	26547
ACH-4-0031	39470	27779	27677	27709	27325	26467
ACH-0013	41991	27793	27662	27724	27428	26459
MMH-0018	58332	31464	31159	31246	30203	26443
ACH-4-0047	49831	31699	31370	31533	30373	26366
MMH-0052	41868	29282	29176	29253	28966	26342
ACH-4-0043	43241	28090	27872	27938	27414	26325
ACH-4-0024	50119	31039	30474	30723	29220	26243
ACH-4-0011	46467	27624	27275	27469	26805	26030
ACH-4-0025	52418	29099	28580	28827	27532	25965
NSH-0023	44119	28878	28652	28755	28265	25823
ACH-0079	38665	27019	26968	27007	26771	25776
MMH-0007	37440	27509	27454	27456	27026	25704
NSH-0033	42477	27740	27596	27643	27304	25664
NSH-0017	41452	27650	27481	27571	27097	25331
NSH-4-0029	46201	29645	29287	29450	27992	25144
ACH-4-0023	42801	26111	25833	25963	25451	25002
NSH-4-0020	42028	27446	27017	27259	26554	24869
MMH-0017	33911	25555	25480	25508	25332	24750
ACH-4-0060	41680	26780	26688	26705	26310	24676
NSH-0020	39079	28224	28122	28201	27785	24595
ACH-0041	34101	25330	25240	25292	25136	24486
NSH-0035	35767	25014	24951	24968	24871	24337
ACH-0008	43871	26424	26302	26351	26035	24278
NSH-0016	47806	28709	28513	28602	27314	24194
MMH-0082	43717	24799	24690	24709	24419	24127
ACH-0007	43000	26947	26722	26864	26095	24033
NSH-0018	46532	26753	26524	26655	25838	23756
MMH-0054	36541	25461	25287	25424	24855	23707
ACH-0068	32509	24175	24115	24134	23987	23692
WT-0008	40142	28115	28016	28073	27888	23357
MMH-4-0024	41564	23926	23691	23835	23369	23167
ACH-4-0056	38540	24136	23988	24034	23786	23083
MMH-4-0053	48508	26675	26316	26538	25779	23024
ACH-4-0039	44309	27591	27411	27468	26945	22735
MMH-0072	35882	24003	23797	23928	23410	22581
NSH-0034	45005	24289	24207	24241	23927	22577
ACH-0085	38309	24458	24234	24376	23746	22354
NSH-4-0010	39606	24312	24119	24178	23580	22111
NSH-0028	34166	23540	23468	23496	23292	22013
NSH-0031	29735	21977	21951	21950	21838	21547
ACH-4-0068	40642	24652	24365	24492	23833	21542
WT-0006	31275	22520	22397	22455	22228	21305
MMH-4-0037	40956	25026	24788	24903	24317	21060
MMH-0037	36207	23227	23098	23178	22801	21025
MMH-0024	28661	21173	21139	21066	21023	20889
MMH-0043	28320	20992	20930	20973	20888	20785
MMH-4-0008	35544	21407	21284	21355	21094	20702
ACH-4-0015	35093	22842	22670	22748	22296	20636
ACH-0010	39301	28564	28415	28515	28153	20595
NSH-0038	38047	22398	22290	22365	22085	20430
MMH-0026	32753	22156	22025	22042	21631	20339
NSH-0011	32715	20829	20787	20793	20694	20194
MMH-0030	32315	23207	23140	23191	23053	20126
NSH-4-0028	34863	22180	21958	22063	21298	19903
ACH-0091	30065	20823	20751	20790	20542	19802
ACH-0015	34461	20451	20389	20390	20064	19502
NSH-0032	30479	19826	19680	19750	19480	18758
ACH-0051	30146	19640	19571	19602	19333	18602
NSH-0002	29403	20045	19912	20005	19664	18572
NSH-0037	33164	20112	19940	19971	19512	18125
NSH-0027	33578	20021	19926	19955	19799	18087
ACH-0056	28996	18737	18677	18709	18371	17799
MMH-0039	26667	17909	17761	17868	17666	17492
ACH-0072	30115	18335	18213	18300	18067	17157
NSH-4-0003	29622	17760	17596	17692	17285	16843
ACH-0064	27687	17644	17585	17585	17411	16804
ACH-0052	27128	17261	17172	17228	16989	16671
ACH-4-0072	33246	18355	18138	18260	17937	16237
NSH-0019	25639	16646	16577	16591	16326	15486
NSH-0040	25663	15314	15249	15273	15183	14897
NSH-0007	25630	15194	15154	15172	15077	14788
MMH-0038	22367	15937	15811	15883	15356	14401
NSH-0036	29264	14327	14217	14251	13903	13037
ACH-0016	15693	10470	10423	10424	10313	10184
MMH-0008	13915	8891	8849	8870	8801	8717
MMH-0069	29128	6982	6852	6889	6266	6098
WT-4-0005	5036	3017	2910	2976	2818	2804
NSH-4-0013	4188	2207	2168	2190	2159	2159
NSH-0025	564	224	203	204	194	194
MMH-4-0045	628	174	154	166	126	123
NSH-0029	187	45	35	35	30	30
ACH-4-0028	191	41	20	18	17	17
MMH-0002	299	63	44	55	16	16
